# Supplementary material for: Multiple biomarkers predict disease severity, progression and mortality in COPD
Source: PubMed Central journal article supplement (PMC5470282; doi:10.1186/s12931-017-0597-7), 2017-06-13

**Supplemental Figure 1. Relationship Between Individual Biomarkers and FEV<sub>1</sub>.**

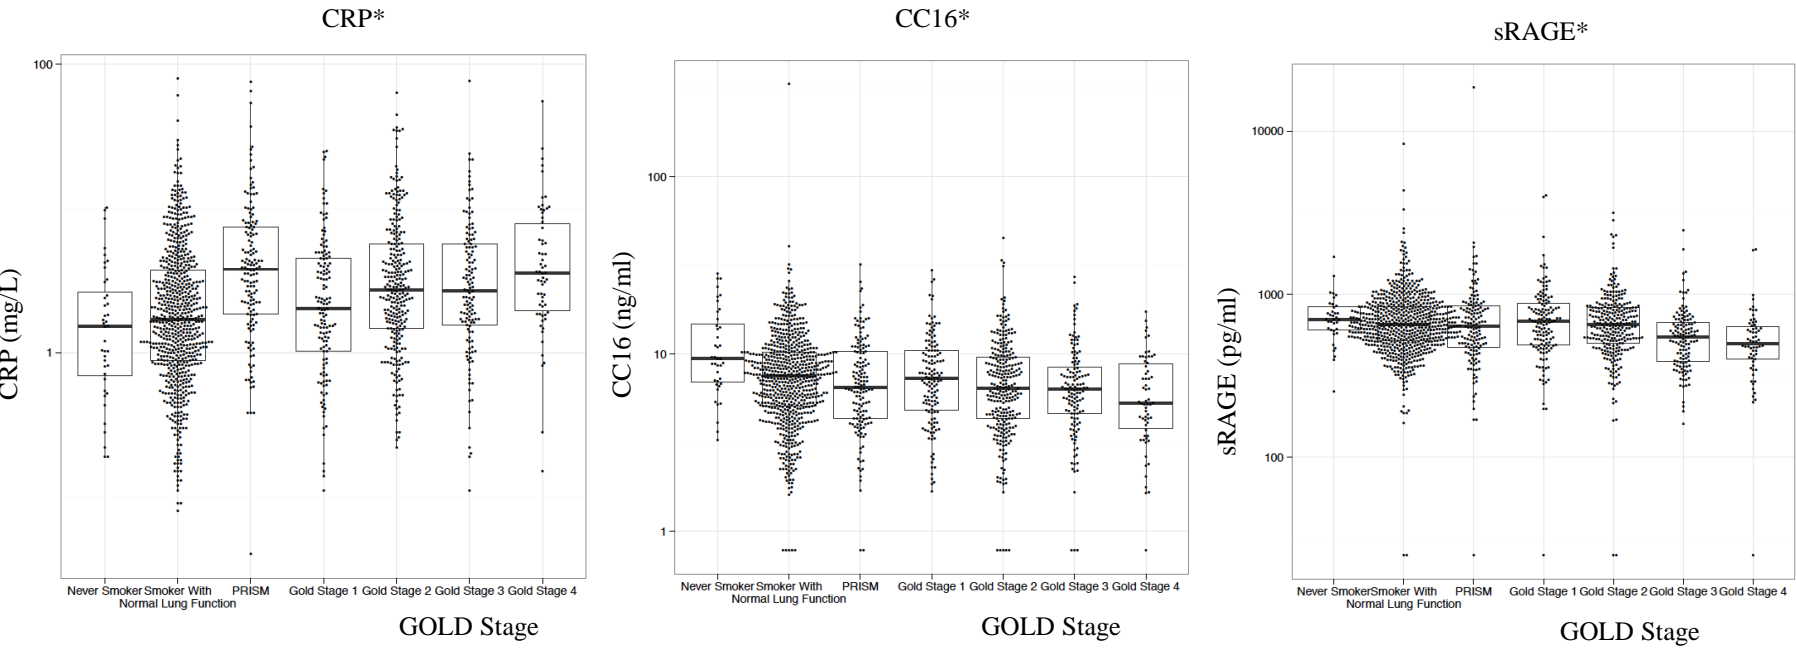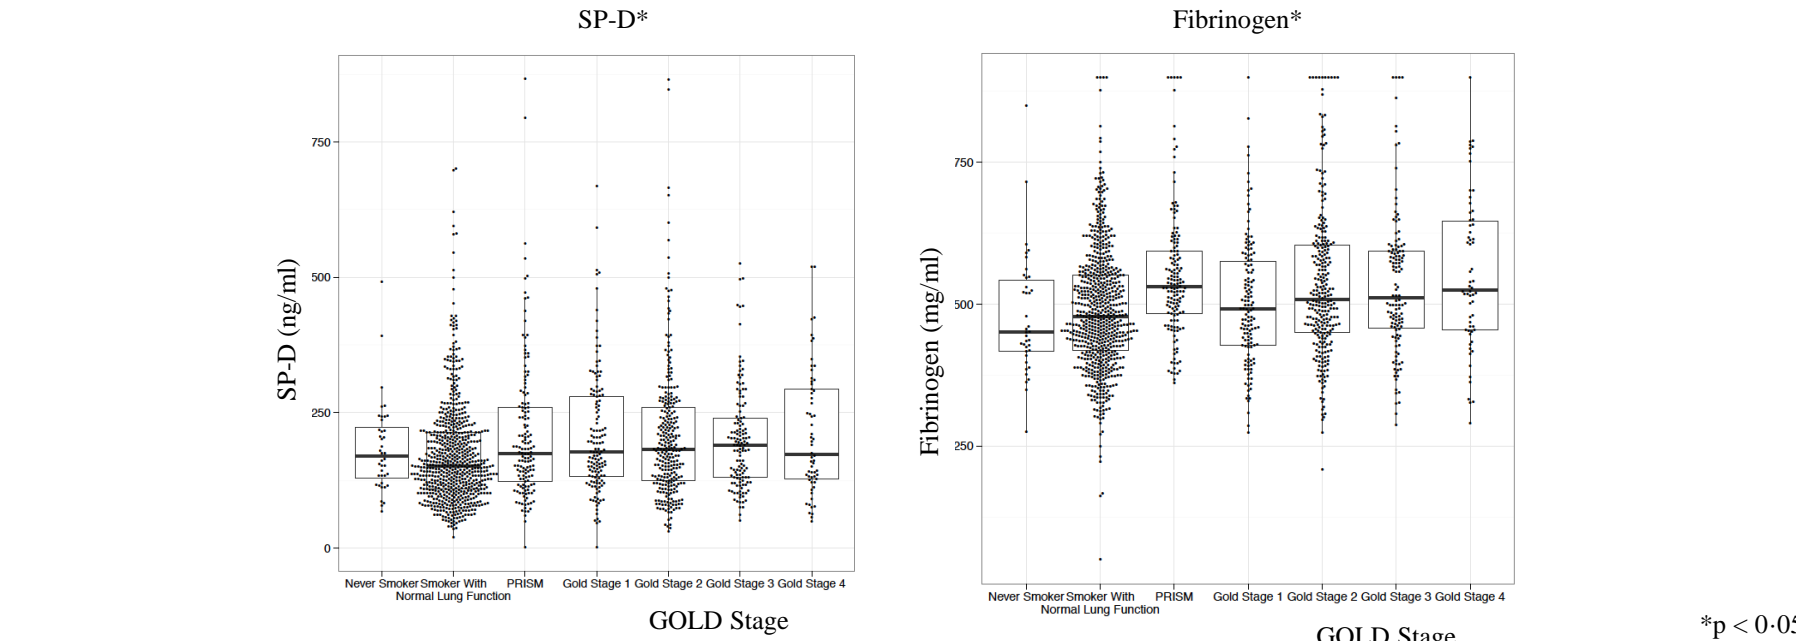

\*p < 0.05

**Supplemental Figure 2. Relationship Between Individual Biomarkers and Emphysema.** Analysis performed by ordinal logistic regression. Covariates were FEV<sub>1</sub>, age, smoking status, gender and BMI. % Emphysema defined as % of voxels with HU < -950. \*p<0.01.

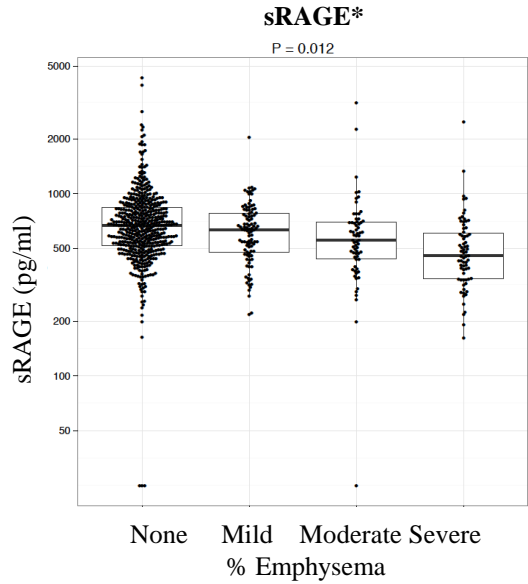

**Supplemental Fig. 3. Distribution of Biomarkers: COPDGene.** Biomarkers are Log Normally Distributed.

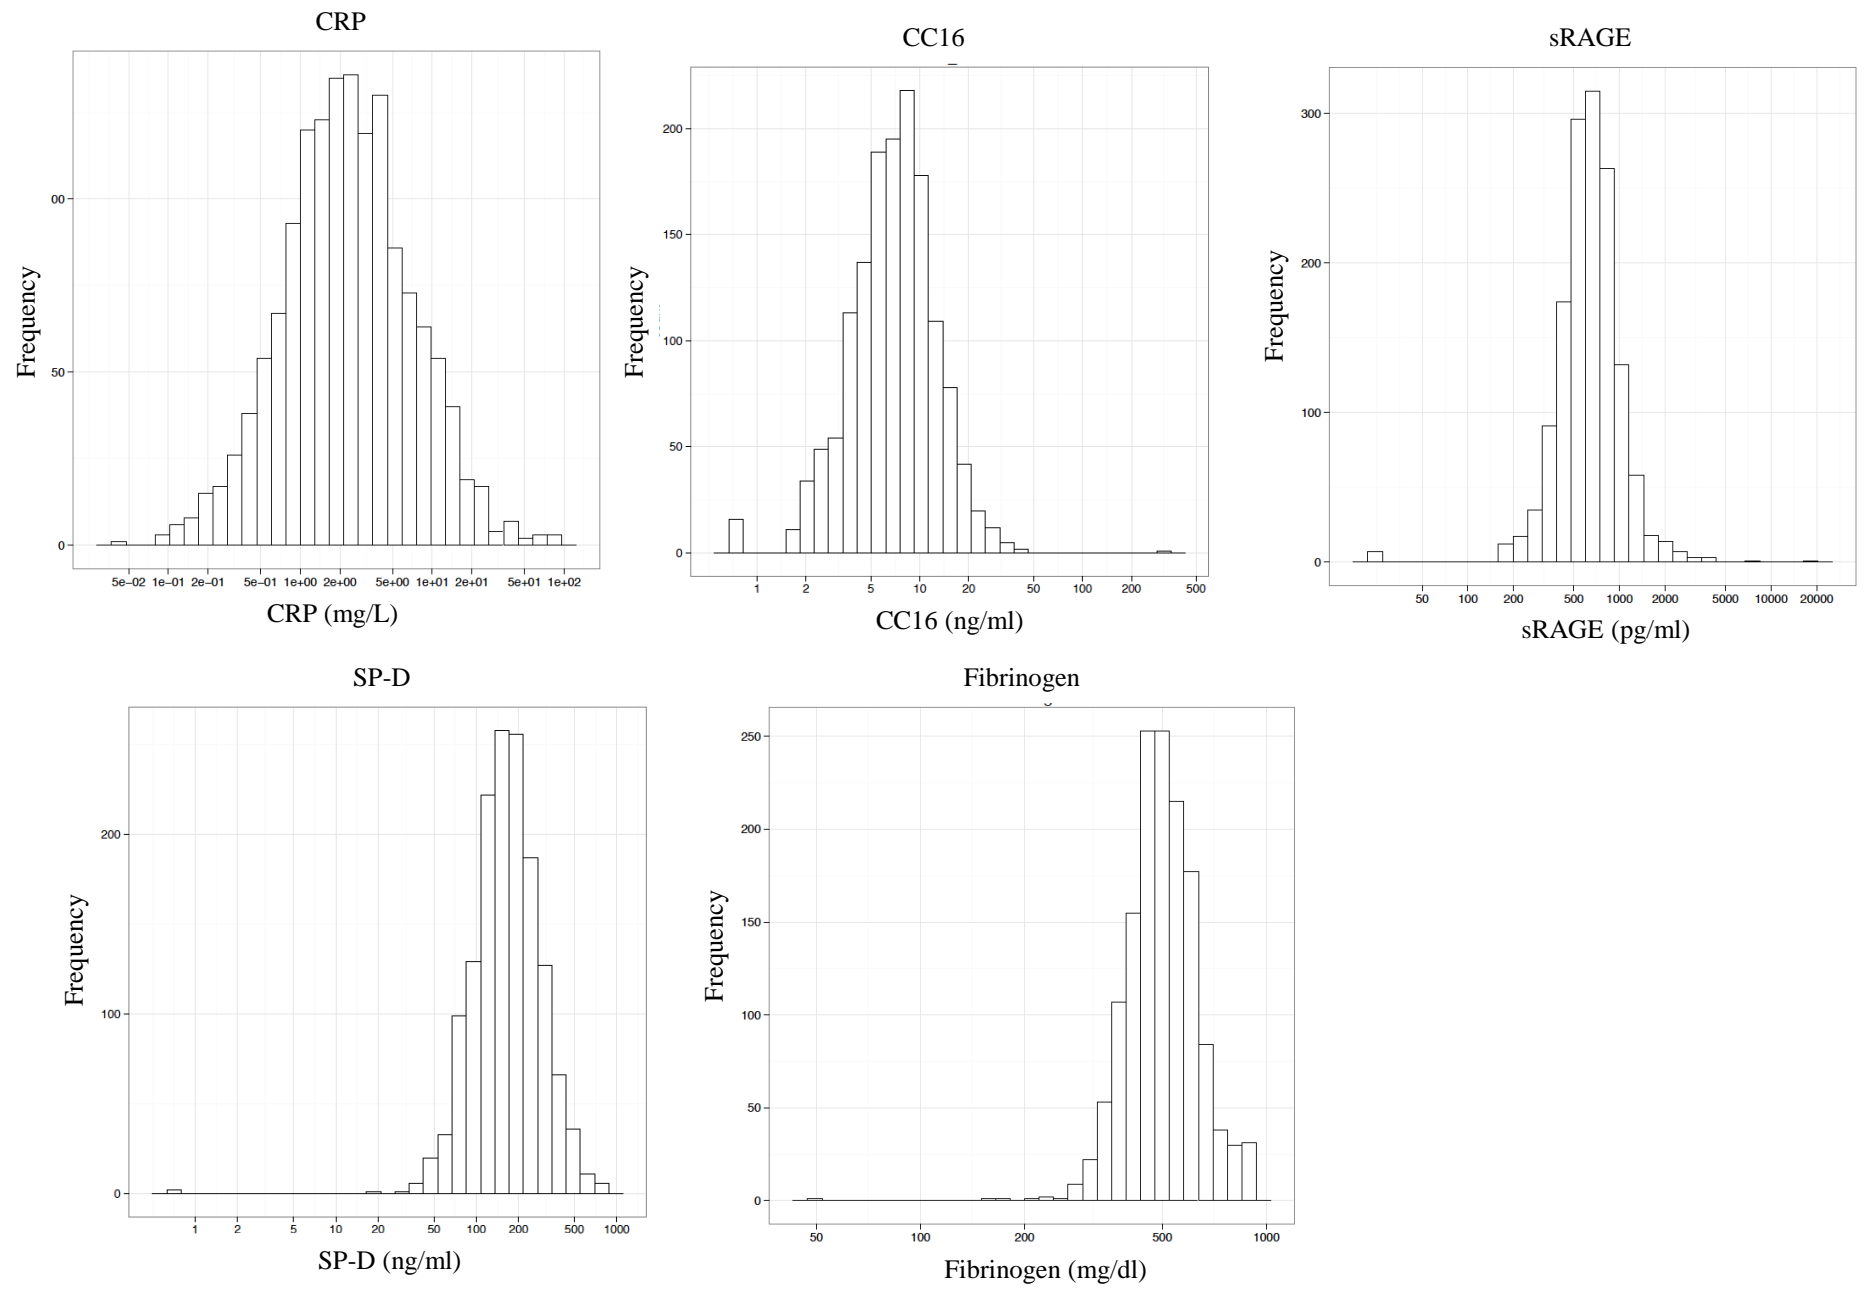

Supplement: 12931_2017_597_MOESM2_ESM.pdf [file 12931_2017_597_MOESM2_ESM.pdf]
